# Supplementary material for: Microbial context predicts SARS-CoV-2 prevalence in patients and the hospital built environment
Source: PubMed Central journal article supplement (PMC7685343; doi:10.1101/2020.11.19.20234229), 2020-11-22
Supplement: NIHPP2020.11.19.20234229-supplement-1.pdf [file NIHPP2020.11.19.20234229-supplement-1.pdf]

876

877 **Supplementary Materials**

It is made available under a [CC-BY 4.0 International license](https://creativecommons.org/licenses/by/4.0/).

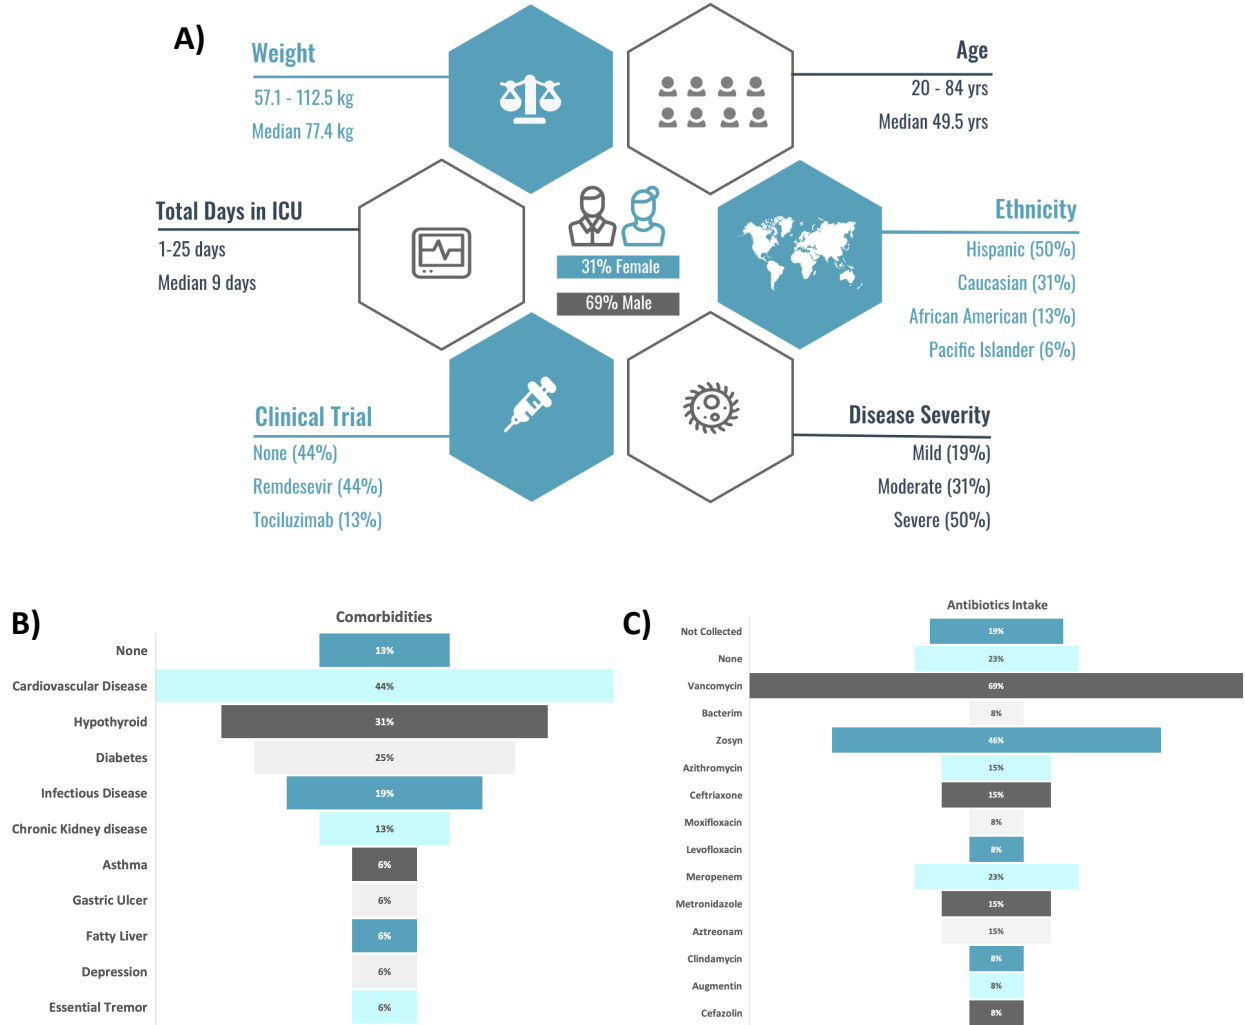

878

879 **Figure S1.** Patient (n=16) demographics (A), antibiotics intake (B), comorbidities (C).

880

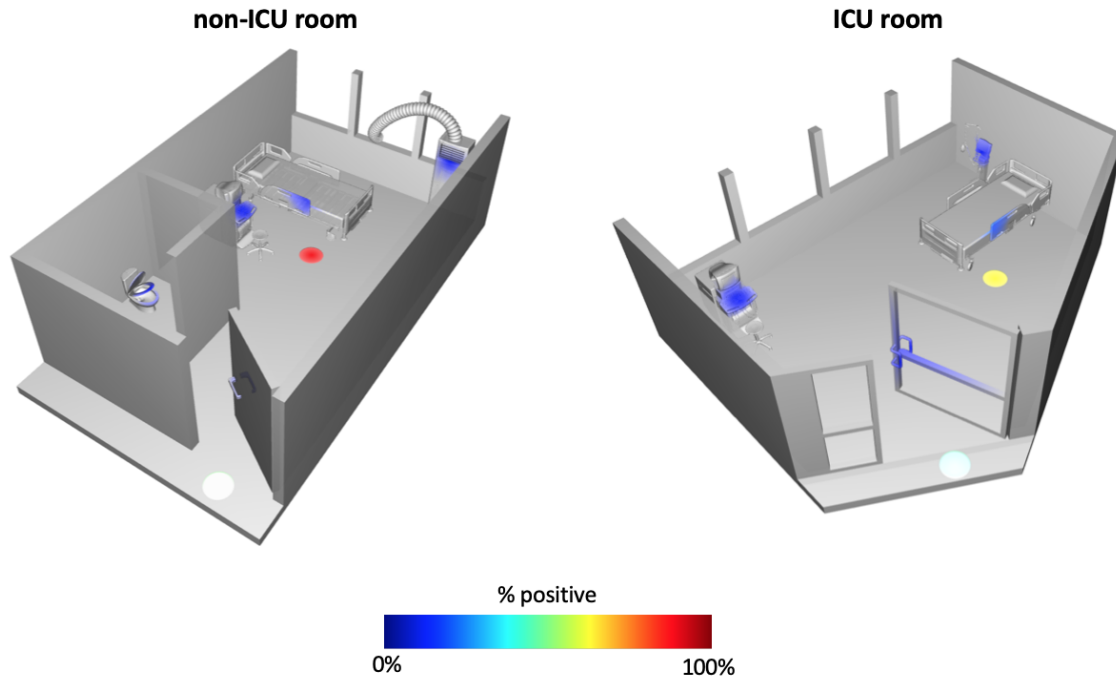

881

882 **Figure S2.** Ili' spatial mapping of standard hospital (non-ICU) room and intensive care unit (ICU)

883 room. Heatmap depicts the percent of samples collected at each site that were positive for SARS-

884 CoV-2.

885

It is made available under a [CC-BY 4.0 International license](https://creativecommons.org/licenses/by/4.0/).

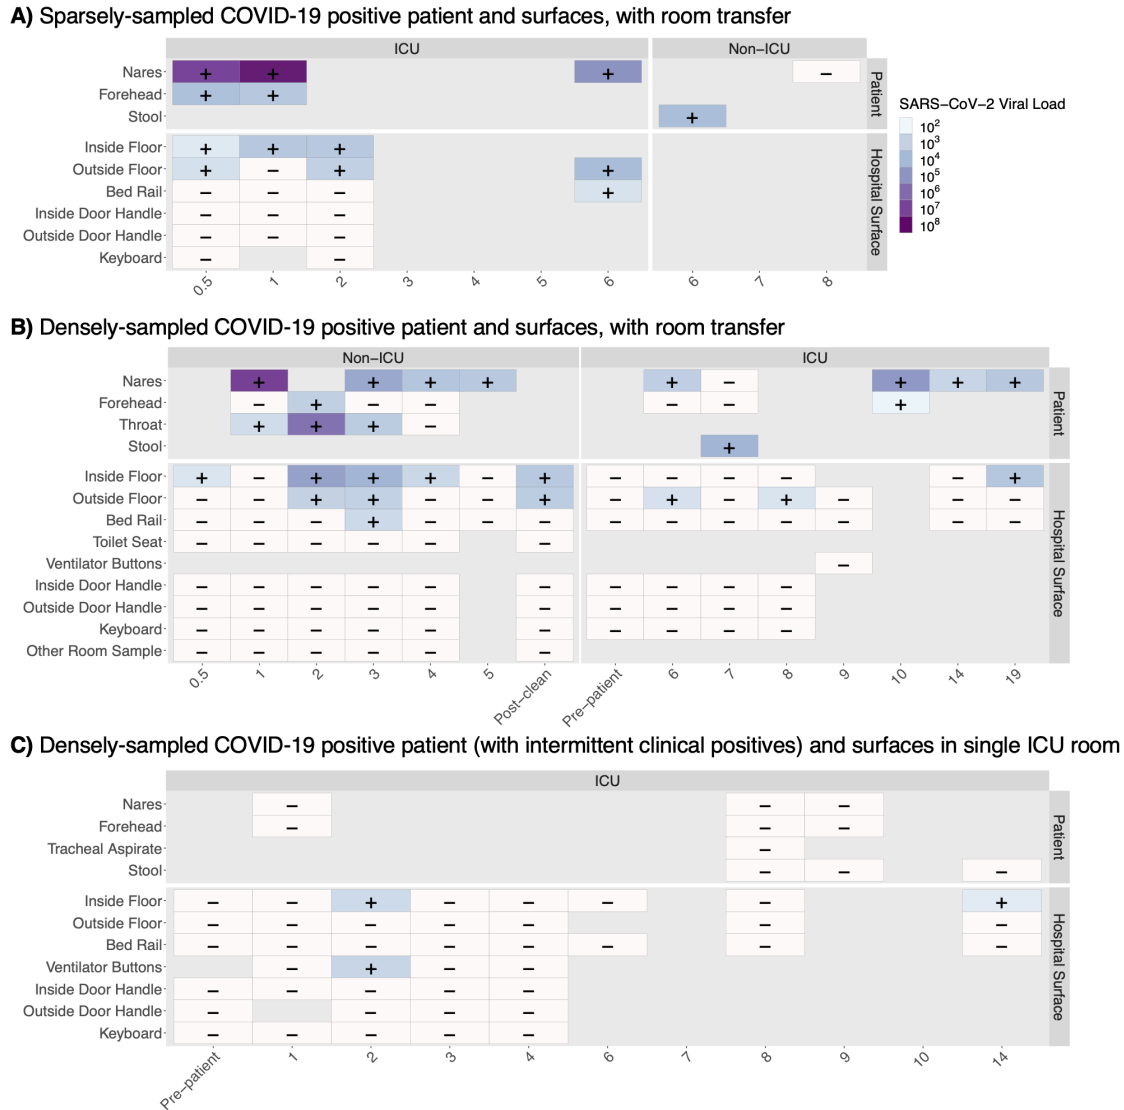

886

887 **Figure S3.** Snapshot of variability in longitudinal sample collection and SARS-CoV-2 viral load

888 per swab between patients and their hospital rooms, starting at patient admission time. For samples

889 where SARS-CoV-2 was detected (+), a darker color indicates a higher viral load. White boxes

890 represent samples with no detectable virus (-). Patient **A** was admitted 12 days after symptom onset

891 and was moved to a general surgery unit room after 6 days in the ICU. Patient **B** was admitted 8

892 days after symptom onset and moved from general surgery to the ICU, where they were intubated.

893 Patient **C** was admitted to the ICU 9 days after symptom onset, and despite having symptoms

894 consistent with COVID-19 repeatedly tested negative by clinical nasopharyngeal swab; their only  
895 clinical positive came from a tracheal aspirate sample mid-way through their stay in the ICU.

896

897

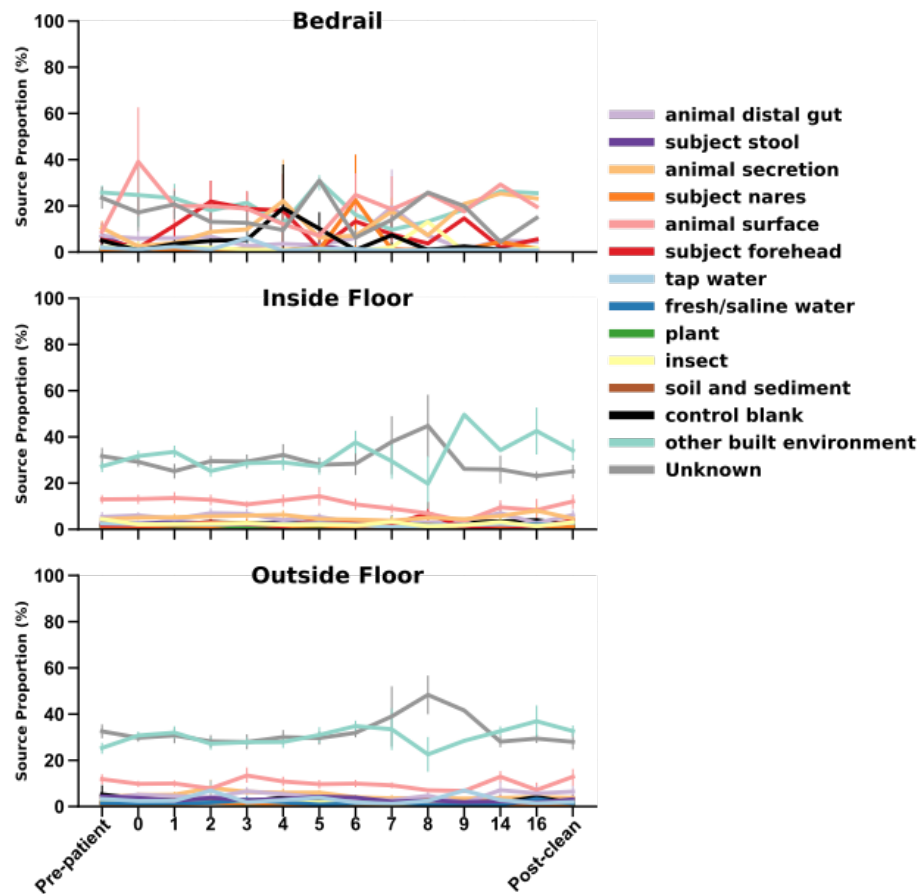

898

899 **Figure S4.** Source tracker on meta-analysis data. Floor samples formed a distinct cluster in this  
900 dataset; source tracking (31) with floor samples (n=215) as the sink and meta-analysis samples  
901 (n=1,990) as the source reveals that these floor samples match other built environment samples.  
902 The other built environment samples included in this meta-analysis were mostly floor (27.7%),  
903 faucet handles (19.6%), and gloves (15%).

904

905

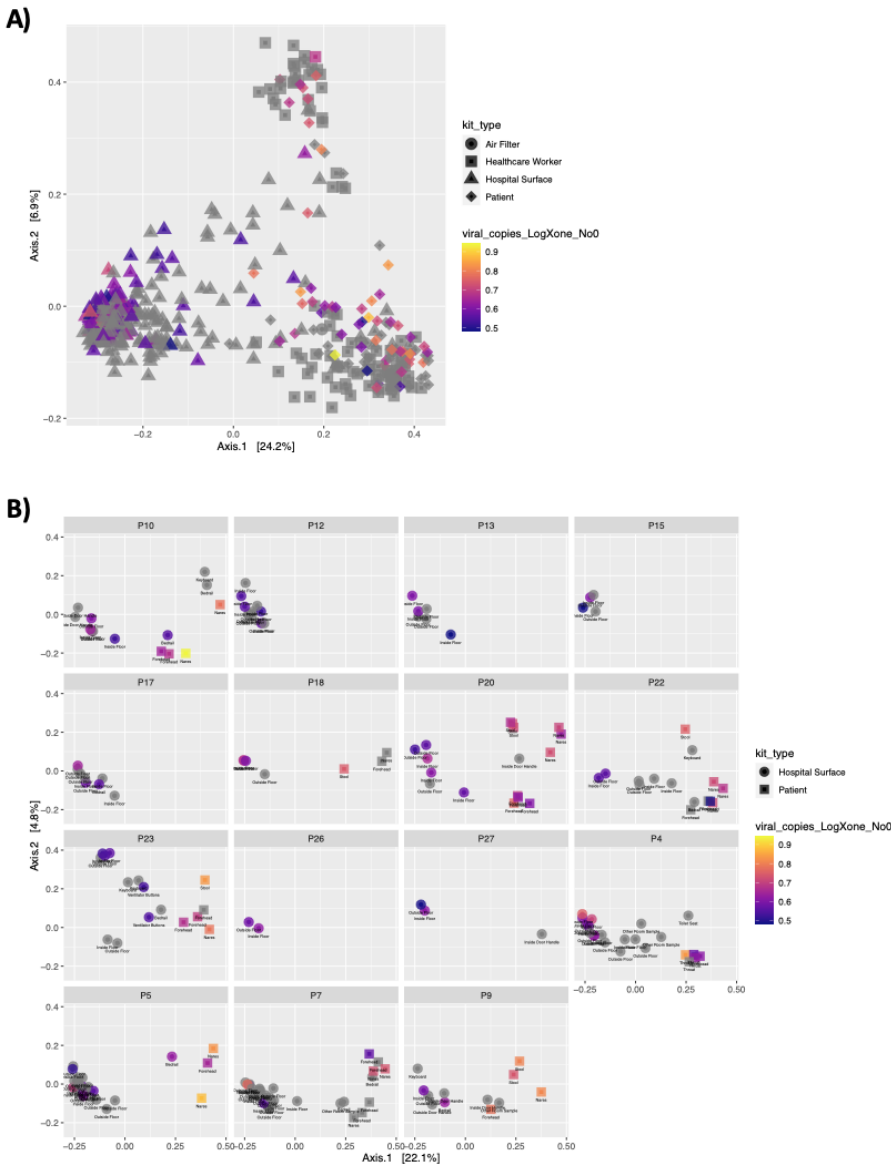

906

907 **Figure S5.** Beta-diversity has a statistically significant but weak correlation with viral load. PCoA  
908 of unweighted UniFrac distances between samples, with SARS-CoV-2 positive samples colored  
909 by viral load across the whole dataset (A) and subset by each patient with at least one surface  
910 positive (B). Statistical analysis performed with Adonis (PERMANOVA) found a small ( $R^2 <$   
911  $0.01$ ) but significant ( $p$ -value = 0.043) association between beta-diversity and viral load across all  
912 samples.

913

914

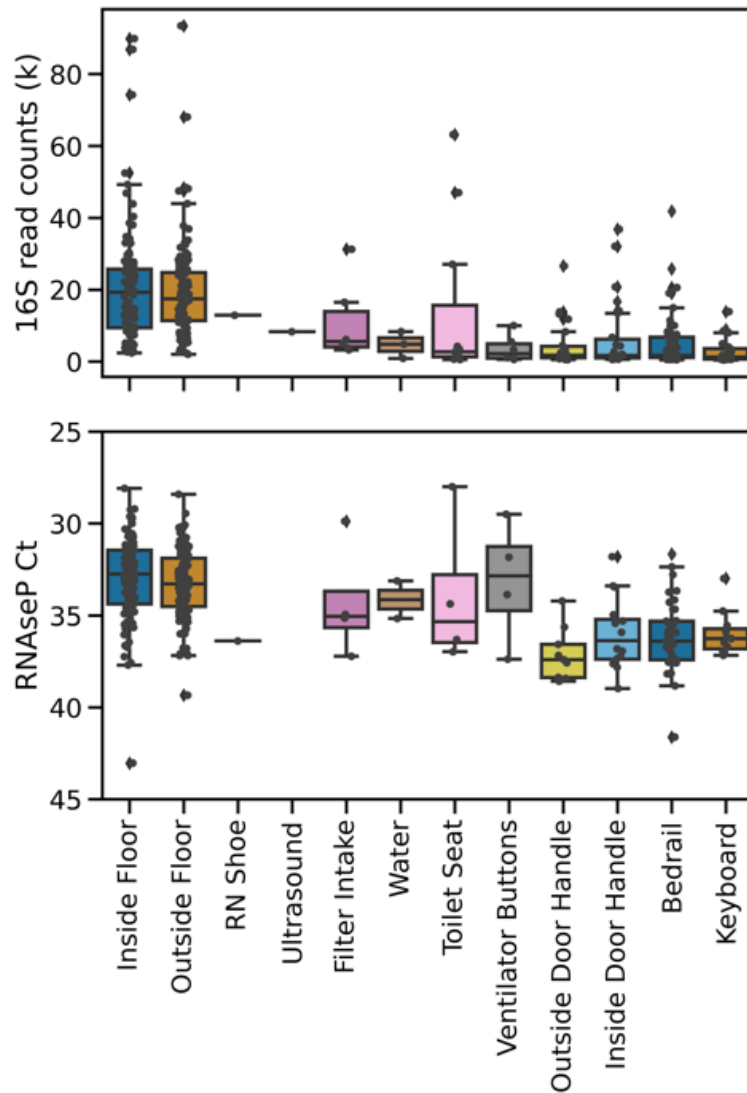

915

916 **Figure S6.** Bacterial (16S rRNA gene amplicon sequencing read count) and human biomass

917 (RNase P Ct) is higher in floor samples than other surface sample types.

918

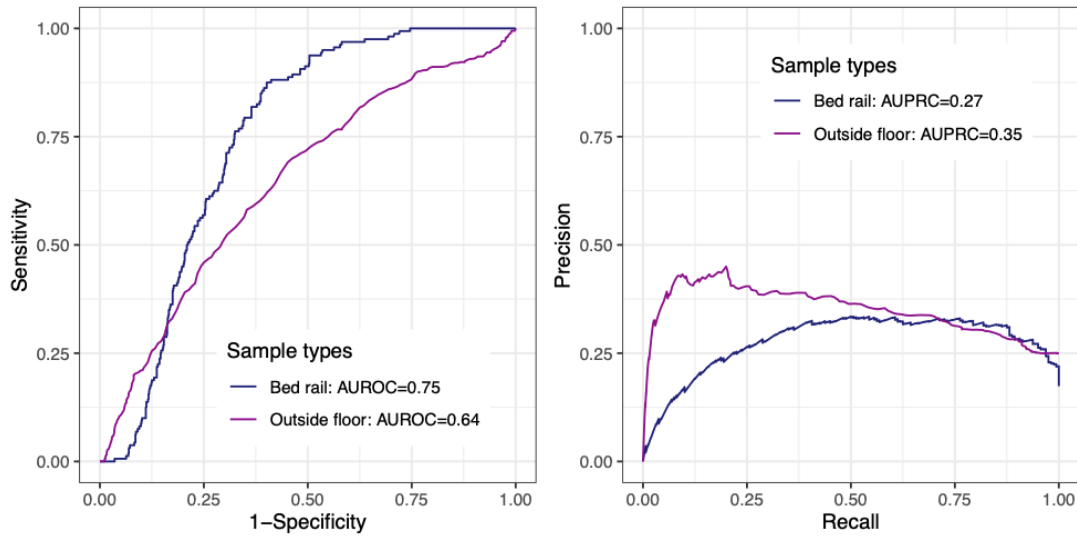

919

920 **Figure S7.** Random Forest classifier performance with 100-fold cross validation in the outside  
921 floor (n=108; 81 not detected vs. 27 positives) and bed rail samples (n=46; 38 not detected vs. 8  
922 positives).

923

924

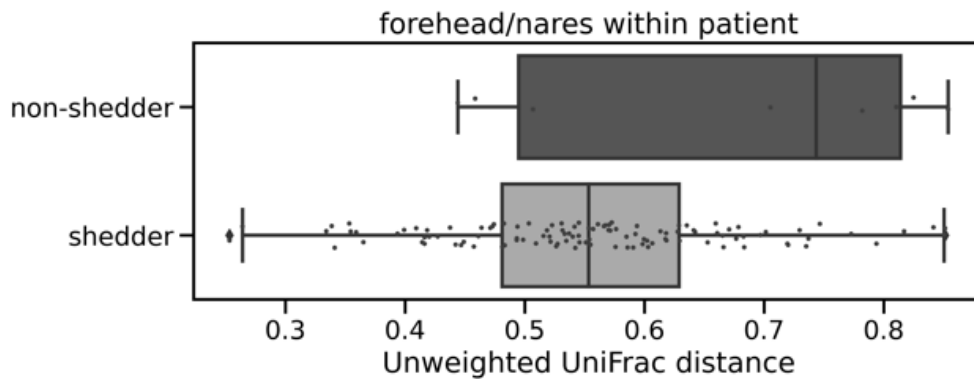

925

926

927 **Figure S8.** Unweighted UniFrac distance between forehead and nares samples from the same host.  
928 ‘Shedder’ (n=12) is a patient who had detectable virus on the surface in their room and ‘non-  
929 shedder’ (n=4) did not. Bootstrapped Kruskal-Wallis p-value is 0.003.

930



931

932

933

934 **Table S1.** Hospital surface materials and cleaning practices.

| Surface             | Material                          | Cleaning schedule                                                                                       | Cleaning material       | Who touches                                                      |
|---------------------|-----------------------------------|---------------------------------------------------------------------------------------------------------|-------------------------|------------------------------------------------------------------|
| Inside floor        | Vinyl tile                        | Variable, infrequent (~1/week)                                                                          | Bleach                  | Universal – health care workers, visitors, patient if ambulatory |
| Outside floor       | Vinyl tile                        | Variable, infrequent (~1/week)                                                                          | Bleach                  | Universal – health care workers, visitors, patient if ambulatory |
| Inside door handle  | Plastic in ICU; Steel outside ICU | Variable, infrequent (~1/week)                                                                          | Hydrogen peroxide wipes | Universal – health care workers, visitors                        |
| Outside door handle | Plastic in ICU; Steel outside ICU | Variable, infrequent (~1/week)                                                                          | Hydrogen peroxide wipes | Universal – health care workers, visitors                        |
| Bed Rail            | Plastic                           | Variable, health care workers wipe down intermittently typically once at the start of shift (~2x daily) | Hydrogen peroxide wipes | health care workers, patient                                     |
| Keyboard            | Plastic                           | Variable, health care workers wipe down intermittently typically once at the start of shift (~2x daily) | Hydrogen peroxide wipes | health care workers                                              |
| Air vent intake     | Plastic                           | Variable, infrequent (~1/week)                                                                          | Hydrogen peroxide wipes | health care workers                                              |
| Ventilator buttons  | Plastic                           | Variable, will be wiped down after no longer needed by patient (average 2-3 times a week)               | Hydrogen peroxide wipes | health care workers (specifically respiratory therapists, MD)    |
| Toilet seat         | Ceramic                           | Variable, at least deep cleaned after patient discharged (average 2-3 times a week)                     | Bleach                  | Patient, visitors                                                |

935

936

937 **Data file S1.** Statistical analysis of pairwise differences in log-ratio across sample types from

938 figure 3D trajectory plot.

939

940 **Data file S2.** Top 100 random forest importance ranks and GreenGenes taxonomy from nares,

941 forehead, stool, and inside floor samples.
